# Supplementary material
Source: publisher figshare collection journal article supplement (https://tandf.figshare.com/ndownloader/files/17590694)

## Appendix A

**Figure A1: Contact with government bureaucracy by employment category in percentages**

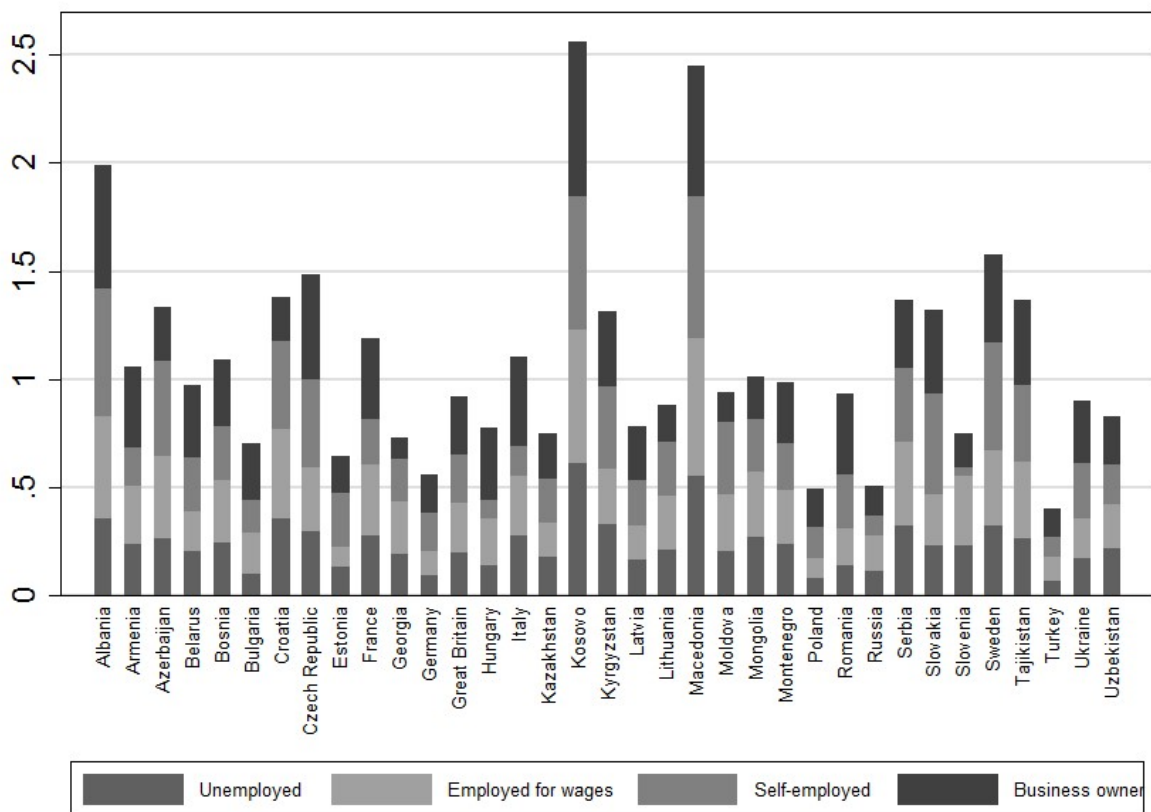

Source: EBRD LiTS 2010, authors' calculations.

## Appendix B

**Table B1: Incidence of corruption by country and occupational status**

| Country                | Incidence of corruption (% of the occupational category) |              |               |                |
|------------------------|----------------------------------------------------------|--------------|---------------|----------------|
|                        | Unemployed                                               | Employed     | Self-employed | Business owner |
| Albania                | 39.60                                                    | 34.09        | 36.17         | 47.83          |
| Armenia                | 12.40                                                    | 3.28         | 0.00          | 66.67          |
| Azerbaijan             | 67.09                                                    | 62.24        | 52.94         | 60.00          |
| Belarus                | 5.88                                                     | 5.94         | 0.00          | 25.00          |
| Bosnia and Herzegovina | 7.25                                                     | 3.70         | 25.00         | 0.00           |
| Bulgaria               | 0.00                                                     | 4.41         | 0.00          | 16.67          |
| Croatia                | 0.79                                                     | 2.27         | 0.00          | 0.00           |
| Czech Republic         | 5.88                                                     | 4.24         | 2.94          | 0.00           |
| Estonia                | 4.76                                                     | 2.94         | 0.00          | 0.00           |
| France                 | 2.56                                                     | 2.63         | 20.00         | 0.00           |
| Georgia                | 2.33                                                     | 0.00         | 0.00          | 0.00           |
| Germany                | 15.00                                                    | 11.29        | 16.67         | 50.00          |
| Great Britain          | 8.89                                                     | 4.72         | 0.00          | 0.00           |
| Hungary                | 0.00                                                     | 0.00         | 0.00          | 11.11          |
| Italy                  | 1.02                                                     | 0.00         | 0.00          | 0.00           |
| Kazakhstan             | 20.31                                                    | 31.51        | 0.00          | 33.33          |
| Kosovo                 | 5.01                                                     | 6.45         | 8.33          | 0.00           |
| Kyrgyzstan             | 72.81                                                    | 46.00        | 90.48         | 66.67          |
| Latvia                 | 6.52                                                     | 5.88         | 0.00          | 0.00           |
| Lithuania              | 7.94                                                     | 6.98         | 33.33         | 0.00           |
| Macedonia              | 8.97                                                     | 5.46         | 0.00          | 11.76          |
| Moldova                | 24.14                                                    | 18.39        | 33.33         | 66.67          |
| Mongolia               | 21.77                                                    | 21.33        | 17.39         | 14.29          |
| Montenegro             | 10.23                                                    | 13.64        | 40.00         | 16.67          |
| Poland                 | 2.27                                                     | 3.70         | 0.00          | 22.22          |
| Romania                | 12.73                                                    | 7.27         | 16.67         | 33.33          |
| Russia                 | 6.12                                                     | 8.96         | 0.00          | 20.00          |
| Serbia                 | 7.41                                                     | 13.55        | 10.00         | 7.14           |
| Slovakia               | 9.38                                                     | 5.88         | 3.70          | 0.00           |
| Slovenia               | 8.33                                                     | 1.63         | 0.00          | 0.00           |
| Sweden                 | 1.72                                                     | 0.54         | 0.00          | 0.00           |
| Tajikistan             | 46.88                                                    | 44.23        | 41.38         | 33.33          |
| Turkey                 | 4.76                                                     | 0.00         | 0.00          | 0.00           |
| Ukraine                | 25.27                                                    | 37.84        | 0.00          | 61.90          |
| Uzbekistan             | 42.77                                                    | 37.35        | 61.54         | 35.71          |
| <b>Mean</b>            | <b>14.82</b>                                             | <b>13.10</b> | <b>14.57</b>  | <b>20.01</b>   |

## Appendix C

**Table C1: Definitions of the variables and descriptive statistics**

| Variable                            | LiTS question                                                                                                                                                                                                                                                               | Obs.  | Mean  | Std. Dev. | Min | Max |
|-------------------------------------|-----------------------------------------------------------------------------------------------------------------------------------------------------------------------------------------------------------------------------------------------------------------------------|-------|-------|-----------|-----|-----|
| <b>Dependent</b>                    |                                                                                                                                                                                                                                                                             |       |       |           |     |     |
| Contact with government bureaucracy | Q6.02: During the past 12 months have you or any member of your household used these services: request official documents (e.g. passport, visa, birth or marriage certificate, land register, etc.?) from authorities? (=1 if answered 'yes', =0 otherwise)                 | 38118 | 0.232 | 0.422     | 0   | 1   |
| Corruption                          | Q6.04: During the past 12 months have you or any household member made an unofficial payment or gift when using these services? (=1 if answered 'yes', =0 otherwise)                                                                                                        | 8560  | 0.166 | 0.372     | 0   | 1   |
| <b>Independent</b>                  |                                                                                                                                                                                                                                                                             |       |       |           |     |     |
| Employed for wages                  | Q5.08: In this job, did you work...? 1) For wages; 2) As self-employed; 3) As independent farmer (= 1 if first answer, =0 otherwise)                                                                                                                                        | 32133 | 0.436 | 0.496     | 0   | 1   |
| Employed for wages (PSU mean)       |                                                                                                                                                                                                                                                                             | 38709 | 0.435 | 0.079     | 0   | 1   |
| Self-employed                       | Q5.08: In this job, did you work...? 1) For wages; 2) As self-employed; 3) As independent farmer<br>Q5.13: How many people do you employ, excluding any household members?<br>(= 1 if first answer to Q5.08 & zero employees reported to Q5.13, and =0 otherwise)           | 32133 | 0.043 | 0.203     | 0   | 1   |
| Self-employed (PSU mean)            |                                                                                                                                                                                                                                                                             | 38709 | 0.043 | 0.024     | 0   | 0.5 |
| Business owner                      | Q5.08: In this job, did you work...? 1) For wages; 2) As self-employed; 3) As independent farmer<br>Q5.13: How many people do you employ, excluding any household members?<br>(= 1 if first answer to Q5.08 & more than zero employees reported to Q5.13, and =0 otherwise) | 32133 | 0.035 | 0.185     | 0   | 1   |

|                                          |                                                                                                                                                                                                                                                                                                                                                                    |       |        |        |       |        |
|------------------------------------------|--------------------------------------------------------------------------------------------------------------------------------------------------------------------------------------------------------------------------------------------------------------------------------------------------------------------------------------------------------------------|-------|--------|--------|-------|--------|
| Business owner (PSU mean)                |                                                                                                                                                                                                                                                                                                                                                                    | 38709 | 0.036  | 0.020  | 0     | 0.25   |
| Technological access                     | Q2.25: Do you or anyone in your household own any of the following? mobile phone; computer; access to Internet at home. (A scale of all three questions is constructed)                                                                                                                                                                                            | 38705 | 0.599  | 0.371  | 0     | 1      |
| Technological access (PSU mean)          | Averaged at PSU level                                                                                                                                                                                                                                                                                                                                              | 38709 | 0.599  | 0.085  | 0.33  | 1      |
| LN city size                             | Population based on data in Wikipedia                                                                                                                                                                                                                                                                                                                              | 38399 | 10.6   | 2.5    | 2.83  | 16.5   |
|                                          |                                                                                                                                                                                                                                                                                                                                                                    |       |        |        |       |        |
| Capital                                  | Capital city                                                                                                                                                                                                                                                                                                                                                       | 38709 | 0.136  | 0.343  | 0     | 1      |
| Institutional trust (Society) (PSU mean) | Q3.03: To what extent do you trust the following institutions... (a) The Presidency; (b) The Government/Cabinet Ministers; (c) Regional Government; (d) Local Government; (e) The Parliament; (f) Courts; (g) Political Parties; (h) Armed Forces; (i) The Police (A scale of all these questions is constructed, and the variable is aggregated to the PSU-level) | 38709 | 2.93   | .15    | 1.69  | 3.81   |
| Bonding trust (Community) (PSU mean)     | Q3.04: To what extent do you trust friends and acquaintances (=1 'complete distrust' thought to 5='complete trust'), aggregated to a psu-level.                                                                                                                                                                                                                    | 38709 | 0.79   | 0.06   | .43   | 1      |
| <b>Controls</b>                          |                                                                                                                                                                                                                                                                                                                                                                    |       |        |        |       |        |
| Consumption                              | Q2.22: Approximately how much does your household spend on each of these items per month: Food, beverage, tobacco; Utilities; Transportation (added together)                                                                                                                                                                                                      | 32647 | 2627   | 10442  | 0     | 181818 |
| Consumption (PSU mean)                   | Consumption variable aggregated to a psu-level                                                                                                                                                                                                                                                                                                                     | 38709 | 2816   | 1771   | 221   | 12034  |
| Gender                                   | Q1.02: Gender of each member of the family (=1 if 'female', and 0='male')                                                                                                                                                                                                                                                                                          | 38665 | 0.604  | 0.489  | 0     | 1      |
| Gender (PSU mean)                        | Gender variable aggregated to a psu-level                                                                                                                                                                                                                                                                                                                          | 38709 | 0.604  | 0.046  | 0     | 1      |
| Age                                      | Q1.04: How old was ... at the last birthday?                                                                                                                                                                                                                                                                                                                       | 38697 | 45.870 | 17.374 | 16    | 99     |
| Age squared                              | Age variable squared                                                                                                                                                                                                                                                                                                                                               | 38697 | 2406   | 1712   | 256   | 9801   |
| Age (PSU mean)                           | Age variable aggregated to a psu-level                                                                                                                                                                                                                                                                                                                             | 38709 | 45.889 | 2.394  | 22.75 | 64.714 |
| Higher Education                         | Q5.15: What is the highest level of education you already completed?                                                                                                                                                                                                                                                                                               | 38699 | 0.202  | 0.402  | 0     | 1      |
| Higher education                         | Higher education variable aggregated to a psu-level                                                                                                                                                                                                                                                                                                                | 38709 | 0.202  | 0.0507 | 0     | 1      |

|            |  |  |  |  |  |  |
|------------|--|--|--|--|--|--|
| (PSU mean) |  |  |  |  |  |  |
|------------|--|--|--|--|--|--|

## Appendix D

**Table D1: City size, residing in capital city and trust: core regression results**

| Variables                       | Model 1                 |                            | Model 2                 |                           |
|---------------------------------|-------------------------|----------------------------|-------------------------|---------------------------|
|                                 | Corruption              | Contact with government    | Corruption              | Contact with government   |
| Employed for wages              | -                       | -0.0225<br>(0.0324)        | -                       | -0.0230<br>(0.0323)       |
| Employed for wages (PSU mean)   | -                       | -0.742**<br>(0.333)        | -                       | -0.381<br>(0.411)         |
| Self-employed                   | -                       | 0.0429<br>(0.0553)         | -                       | 0.0416<br>(0.0552)        |
| Self-employed (PSU mean)        | -                       | -0.163<br>(0.639)          | -                       | 0.306<br>(0.696)          |
| Business owner                  | -                       | 0.181***<br>(0.0578)       | -                       | 0.179***<br>(0.0577)      |
| Business owner (PSU mean)       | -                       | -0.681<br>(0.797)          | -                       | -0.499<br>(0.809)         |
| LN city size                    | 0.0996***<br>(0.0248)   | -0.0383***<br>(0.00944)    | 0.0926***<br>(0.0263)   | -0.0388***<br>(0.00958)   |
| Capital city                    | -0.442***<br>(0.153)    | 0.248***<br>(0.0891)       | -0.450**<br>(0.180)     | 0.224***<br>(0.0696)      |
| Institutional trust (PSU mean)  | 0.291<br>(0.373)        | -0.0250<br>(0.135)         | 0.158<br>(0.389)        | -0.0699<br>(0.137)        |
| Trust in friends (PSU mean)     | -4.080***<br>(0.849)    | -0.151<br>(0.389)          | -2.155*<br>(1.193)      | 0.254<br>(0.434)          |
| Control variables               |                         |                            |                         |                           |
| Technological access            | -0.718***<br>(.0986)    | 0.398***<br>(0.0446)       | -0.691***<br>(0.101)    | 0.405***<br>(0.0448)      |
| Technological access (PSU mean) | -                       | -                          | -2.107***<br>(0.798)    | -0.569*<br>(0.309)        |
| Consumption                     | -3.94e-06               | 6.52e-06***<br>(1.51e-06)  | -1.61e-06<br>(3.96e-06) | 6.97e-06***<br>(1.53e-06) |
| Consumption (PSU mean)          | -                       | -                          | 5.00e-07<br>(3.14e-05)  | -1.92e-05<br>(1.21e-05)   |
| Gender                          | -0.0321<br>(0.0564)     | -0.0231<br>(0.0243)        | -0.0273<br>(0.0567)     | -0.0226<br>(0.0242)       |
| Gender (PSU mean)               | 0.898<br>(1.135)        | 0.0541<br>(0.415)          | 0.105<br>(1.244)        | 0.0429<br>(0.409)         |
| Age                             | 0.00810<br>(0.0100)     | 0.0120**<br>(0.00581)      | 0.00737<br>(0.0102)     | 0.0121**<br>(0.00581)     |
| Age squared                     | -0.000186<br>(0.000113) | -0.000196***<br>(6.89e-05) | -0.000174<br>(0.000115) | -0.0002***<br>(6.89e-05)  |

|                                  |                      |                       |                      |                       |
|----------------------------------|----------------------|-----------------------|----------------------|-----------------------|
| Age (PSU mean)                   | -0.00765<br>(0.0219) | -0.0166*<br>(0.00873) | -0.0196<br>(0.0261)  | -0.0167*<br>(0.00892) |
| Higher Education                 | -0.0187<br>(0.0673)  | 0.223***<br>(0.0286)  | -0.00507<br>(0.0688) | 0.216***<br>(0.0282)  |
| Higher education (PSU mean)      | -                    | -                     | 0.434<br>(1.092)     | 0.540<br>(0.373)      |
| Constant                         | -1.478<br>(1.159)    | -0.0530<br>(0.500)    | 0.573<br>(1.521)     | -0.0394<br>(0.517)    |
| Level 2: PSU                     |                      |                       |                      |                       |
| St dev (Corruption)              | 1.39*** (0.06)       |                       | 1.49*** (0.08)       |                       |
| St dev (Contact with government) | 0.75*** (0.02)       |                       | 0.75*** (0.02)       |                       |
| Cross-eq correlation             | 0.127*** (0.06)      |                       | 0.143*** (0.05)      |                       |
| Level 1: Individuals             |                      |                       |                      |                       |
| Cross-eq correlation             | -0.039 (0.055)       |                       | -0.02 (0.06)         |                       |
| Observations                     | 20504                |                       | 20504                |                       |
| Log Likelihood                   | -11553               |                       | -11540               |                       |
| df                               | 30                   |                       | 36                   |                       |

## Appendix E

**Table E1: City size, residing in capital city and trust: interaction regression results**

| Variables                                            | Model 3             |                         | Model 4              |                         | Model 5              |                         |
|------------------------------------------------------|---------------------|-------------------------|----------------------|-------------------------|----------------------|-------------------------|
|                                                      | Corruption          | Contact with government | Corruption           | Contact with government | Corruption           | Contact with government |
| Employed for wages                                   | -                   | -0.022<br>(0.032)       |                      | -0.022<br>(0.032)       |                      | -0.0223<br>(0.0324)     |
| Employed for wages (PSU mean)                        | -                   | -0.309<br>(0.408)       |                      | -0.342<br>(0.409)       |                      | -0.340<br>(0.410)       |
| Self-employed                                        | -                   | 0.045<br>(0.055)        |                      | 0.0454<br>(0.0552)      |                      | 0.0442<br>(0.0553)      |
| Self-employed (PSU mean)                             | -                   | .346<br>(0.693)         |                      | 0.299<br>(0.694)        |                      | 0.191<br>(0.699)        |
| Business owner                                       | -                   | 0.182***<br>(0.058)     |                      | 0.183***<br>(0.0577)    |                      | 0.182***<br>(0.0578)    |
| Business owner (PSU mean)                            | -                   | -0.422<br>(0.807)       |                      | -0.403<br>(0.813)       |                      | -0.264<br>(0.825)       |
| LN city size                                         | 0.095***<br>(.034)  | -0.039***<br>(.009)     | 0.076***<br>(0.0237) | -0.0395***<br>(0.0094)  | 0.109***<br>(0.0276) | -0.0387***<br>(0.00952) |
| Capital city                                         | -0.578***<br>(.208) | 0.246***<br>(.067)      | -0.472***<br>(0.146) | 0.251***<br>(0.0681)    | -0.544***<br>(0.158) | 0.258***<br>(0.0685)    |
| Institutional trust (PSU mean)                       | 0.114<br>(.391)     | -0.051<br>(.145)        | -                    | -                       | 0.602<br>(0.460)     | -0.0373<br>(0.162)      |
| Trust in friends (PSU mean)                          | -                   | -                       | -2.045**<br>(1.004)  | 0.307<br>(0.438)        | -3.481***<br>(1.107) | 0.336<br>(0.451)        |
| Interaction results                                  |                     |                         |                      |                         |                      |                         |
| LN city size x Institutional trust (PSU)             | -0.420*<br>(0.251)  | -0.169<br>(.064)        | -                    | -                       | -0.408<br>(0.266)    | -0.0267<br>(0.0738)     |
| Capital city x Institutional trust (PSU)             | 0.339<br>(1.37)     | 0.015<br>(.490)         | -                    | -                       | -0.0757<br>(1.496)   | 0.351<br>(0.565)        |
| LN city size x Trust in friends (PSU)                | -                   | -                       | -0.746**<br>(0.318)  | 0.0709<br>(0.158)       | -0.380<br>(0.337)    | 0.0927<br>(0.164)       |
| Capital city x Trust in friends (PSU)                | -                   | -                       | 4.57<br>(2.881)      | -0.235<br>(1.272)       | 4.709<br>(3.182)     | -0.119<br>(1.278)       |
| Institutional Trust x Trust in friends (PSU)         | -                   | -                       | -                    | -                       | -3.151<br>(4.139)    | -0.625<br>(1.360)       |
| LN city size_x_Instit Trust_x_Trust in friends (PSU) | -                   | -                       | -                    | -                       | -3.823<br>(2.499)    | 0.0929<br>(0.786)       |
| Capital city_x_Instit Trust_x_Trust in friends (PSU) | -                   | -                       | -                    | -                       | 12.00<br>(19.37)     | -7.061<br>(5.605)       |



| Control variables                |                        |                          |                         |                          |                          |                          |
|----------------------------------|------------------------|--------------------------|-------------------------|--------------------------|--------------------------|--------------------------|
| Technological access             | -0.8***<br>(.099)      | 0.403***<br>(.045)       | -0.736***<br>(0.0972)   | 0.403***<br>(0.045)      | -0.721***<br>(0.0974)    | 0.406***<br>(0.0447)     |
| Technological access (PSU mean)  | -2.8***<br>(.769)      | -0.498*<br>(.281)        | -2.34***<br>(0.75)      | -0.588*<br>(0.309)       | -1.862**<br>(0.759)      | -0.564*<br>(0.312)       |
| Consumption                      | -2.89e-06<br>(4.8e-06) | 6.8e-06***<br>(1.52e-06) | -3.66e-06<br>(4.49e-06) | 6.8e-06***<br>(1.52e-06) | -3.29e-06<br>(4.64e-06)  | 6.8e-06***<br>(1.52e-06) |
| Consumption (PSU mean)           | -.000<br>(.000)        | -0.000<br>(.000)         | -2.33e-05<br>(3.00e-05) | -1.74e-05<br>(1.20e-05)  | -1.41e-05<br>(3.12e-05)  | -1.87e-05<br>(1.21e-05)  |
| Gender                           | -0.049<br>(.057)       | -0.022<br>(.024)         | -0.0448<br>(0.0564)     | -0.0224<br>(0.0242)      | -0.0424<br>(0.0560)      | -0.0222<br>(0.0242)      |
| Gender (PSU mean)                | -.136<br>(1.41)        | -0.066<br>(.402)         | 0.566<br>(1.034)        | -0.0116<br>(0.405)       | 0.509<br>(1.042)         | 0.00682<br>(0.406)       |
| Age                              | 0.011<br>(.010)        | 0.012**<br>(.006)        | 0.0106<br>(0.01)        | 0.0119**<br>(0.0058)     | 0.00851<br>(0.0100)      | 0.0120**<br>(0.00580)    |
| Age squared                      | -0.00**<br>(.000)      | -0.000***<br>(.000)      | -0.00022*<br>(0.00011)  | -0.0002***<br>(6.89e-05) | -0.000192*<br>(0.000113) | -0.0002***<br>(6.89e-05) |
| Age (PSU mean)                   | -0.037<br>(.027)       | -0.016*<br>(.008)        | -0.0151<br>(0.0222)     | -0.0181**<br>(0.0087)    | -0.0123<br>(0.0222)      | -0.0182**<br>(0.00887)   |
| Higher Education                 | -0.024<br>(.069)       | 0.218***<br>(.028)       | -0.0295<br>(0.0692)     | 0.219***<br>(0.0282)     | -0.0186<br>(0.0677)      | 0.219***<br>(0.0282)     |
| Higher education (PSU mean)      | 1.27<br>(1.16)         | 0.588<br>(.361)          | 1.052<br>(1.001)        | 0.637*<br>(0.367)        | 0.490<br>(1.028)         | 0.612*<br>(0.370)        |
| Constant                         | 2.0<br>(1.40)          | -.092<br>(.494)          | 0.319<br>(1.357)        | 0.0192<br>(0.511)        | 0.0354<br>(1.335)        | 0.00490<br>(0.517)       |
| St dev (Corruption)              | 1.44*** (0.09)         |                          | 1.48*** (0.07)          |                          | 1.44*** (0.07)           |                          |
| St dev (Contact with government) | 0.75*** (0.02)         |                          | 0.75*** (0.02)          |                          | 0.75*** (0.02)           |                          |
| Cross-eq correlation             | 0.09*(0.05)            |                          | 0.08*(0.05)             |                          | 0.108**<br>(0.0499)      |                          |
| Cross-eq correlation             | -0.06 (0.05)           |                          | -0.06 (0.05)            |                          | -0.04(0.05)              |                          |
| Observations                     | 20504                  |                          | 20504                   |                          | 20504                    |                          |
| Log Likelihood                   | -11545                 |                          | -11542                  |                          | -11537                   |                          |
| df                               | 38                     |                          | 38                      |                          | 50                       |                          |

## Appendix F

**Table F1: Average marginal effects results (based on models in Appendices D and E)**

| Core Independent variables                                               | Model 1<br>dy/dx    | Model 2<br>dy/dx    | Model 3<br>dy/dx  | Model 4<br>dy/dx  | Model 5<br>dy/dx    |
|--------------------------------------------------------------------------|---------------------|---------------------|-------------------|-------------------|---------------------|
| LN city size                                                             | 0.008***<br>(0.002) | 0.006***<br>(0.002) | .008**<br>(.004)  | .007***<br>(.002) | .009***<br>(.003)   |
| Capital city=0                                                           | 0.046***<br>(0.008) | 0.035***<br>(0.008) |                   |                   |                     |
| Capital city=1                                                           | 0.018***<br>(0.006) | 0.013**<br>(0.005)  | -                 | -                 | -                   |
| LN city size conditional on Institutional trust (PSU)                    | -                   | -                   | .008**<br>(0.003) | -                 | -                   |
| LN city size conditional on Trust in friends (PSU)                       | -                   | -                   | -                 | .006***<br>(.002) | -                   |
| LN city size conditional on Institutional Trust & Trust in friends (PSU) | -                   | -                   | -                 | -                 | 0.008***<br>(0.002) |

**Note:** Ln city size, bonding, and bridging trust variables are centered. The ‘dy/dx’ indicates the average marginal effect of the respective variable (i.e. margins of derivative) on the change in the probability of corruption. In case of interaction terms, this shows the marginal effect of city size conditional on a mean value of the respective trust variable. Note for models 1 and 2 we report the margins for capital city=0 and capital city=1.

## Appendix G

**Table G1: City size, residing in capital city and trust: robustness checks**

| Variables                         | Model 6               |                         | Model 7               |                         | Model 8              |                         |
|-----------------------------------|-----------------------|-------------------------|-----------------------|-------------------------|----------------------|-------------------------|
|                                   | Corruption            | Contact with government | Corruption            | Contact with government | Corruption           | Contact with government |
| Employed for wages                | -                     | -0.0223<br>(0.0324)     |                       | -0.0222<br>(0.0324)     |                      | -0.0220<br>(0.0324)     |
| Employed for wages<br>(PSU mean)  | -                     | -0.298<br>(0.415)       |                       | -0.344<br>(0.409)       |                      | -0.324<br>(0.417)       |
| Self-employed                     | -                     | 0.0440<br>(0.0553)      |                       | 0.0455<br>(0.0552)      |                      | 0.0433<br>(0.0553)      |
| Self-employed<br>(PSU mean)       | -                     | 0.189<br>(0.723)        |                       | 0.278<br>(0.695)        |                      | -0.0163<br>(0.731)      |
| Business owner                    | -                     | 0.182***<br>(0.0577)    |                       | 0.183***<br>(0.0577)    |                      | 0.182***<br>(0.0578)    |
| Business owner<br>(PSU mean)      | -                     | -0.435<br>(0.818)       |                       | -0.379<br>(0.811)       |                      | -0.219<br>(0.839)       |
| Ln city size                      | 0.0904***<br>(0.0330) | -0.0389***<br>(0.00947) | 0.0793***<br>(0.0241) | -0.0385***<br>(0.00963) | 0.119***<br>(0.0308) | -0.0371***<br>(0.00980) |
| Capital                           | -0.611***<br>(0.201)  | 0.247***<br>(0.0681)    | -0.544***<br>(0.177)  | 0.234***<br>(0.0765)    | -0.683***<br>(0.193) | 0.237***<br>(0.0781)    |
| Institutional Trust<br>(PSU mean) | -4.096<br>(3.661)     | 1.050<br>(1.304)        | -                     | -                       | -2.446<br>(3.151)    | 1.015<br>(1.311)        |
| Trust in friends<br>(PSU mean)    |                       | -                       | -13.17<br>(15.55)     | -2.322<br>(5.488)       | -22.68<br>(15.90)    | -2.952<br>(5.747)       |

| Interactive effects with trust variables                   |                         |                            |                         |                            |                         |                            |
|------------------------------------------------------------|-------------------------|----------------------------|-------------------------|----------------------------|-------------------------|----------------------------|
| Ln city size_x<br>Institutional Trust                      | -0.351<br>(0.250)       | -0.0143<br>(0.0649)        | -                       | -                          | -0.453<br>(0.293)       | -0.0223<br>(0.0752)        |
| Capital city_x<br>Institutional Trust                      | -0.157<br>(1.429)       | 0.0115<br>(0.494)          | -                       | -                          | 0.207<br>(1.584)        | 0.336<br>(0.576)           |
| Ln city_size_x_<br>Trust in friends                        | -                       | -                          | -0.745**<br>(0.317)     | 0.0700<br>(0.158)          | -0.347<br>(0.340)       | 0.101<br>(0.165)           |
| Capital city_x<br>Trust in friends                         | -                       | -                          | 4.369<br>(2.842)        | -0.258<br>(1.266)          | 4.271<br>(3.269)        | -0.135<br>(1.284)          |
| Institutional<br>Trust_<br>x_Trust in friends              | -                       | -                          | -                       | -                          | -2.238<br>(4.462)       | -0.804<br>(1.501)          |
| Ln_city_size_x<br>Institut. Trust_x<br>Trust in friends    | -                       | -                          | -                       | -                          | -4.050<br>(2.652)       | -0.00833<br>(0.812)        |
| Capital city_x<br>Institut. Trust_x<br>Trust in friends    | -                       | -                          | -                       | -                          | 9.059<br>(19.84)        | -6.650<br>(5.765)          |
| Fitted Residuals<br>from Stage one<br>(institution. trust) | 4.323<br>(3.758)        | -1.111<br>(1.313)          | -                       | -                          | 2.969<br>(3.173)        | -1.059<br>(1.314)          |
| Fitted Residuals<br>from Stage one<br>(trust in friends)   | -                       | -                          | 11.25<br>(15.68)        | 2.657<br>(5.526)           | 19.26<br>(15.87)        | 3.334<br>(5.801)           |
|                                                            |                         |                            |                         |                            |                         |                            |
| Technological<br>access                                    | -0.750***<br>(0.0986)   | 0.402***<br>(0.0449)       | -0.735***<br>(0.0970)   | 0.403***<br>(0.0448)       | -0.716***<br>(0.0972)   | 0.405***<br>(0.0448)       |
| Technological<br>access (PSU<br>mean)                      | -1.892*<br>(0.984)      | -0.745*<br>(0.383)         | 1.503<br>(5.387)        | 0.308<br>(1.889)           | 5.544<br>(5.546)        | 0.328<br>(1.999)           |
| Consumption                                                | -2.38e-06<br>(4.76e-06) | 6.76e-06***<br>(1.52e-06)  | -3.29e-06<br>(4.54e-06) | 6.86e-06***<br>(1.54e-06)  | -2.58e-06<br>(4.65e-06) | 6.90e-06***<br>(1.54e-06)  |
| Consumption<br>(PSU mean)                                  | -6.27e-05<br>(5.47e-05) | -6.62e-06<br>(1.84e-05)    | -2.79e-05<br>(3.08e-05) | -1.85e-05<br>(1.22e-05)    | -5.72e-05<br>(4.85e-05) | -9.17e-06<br>(1.86e-05)    |
| Gender                                                     | -0.0480<br>(0.0565)     | -0.0217<br>(0.0243)        | -0.0436<br>(0.0565)     | -0.0223<br>(0.0242)        | -0.0409<br>(0.0561)     | -0.0210<br>(0.0243)        |
| Gender (PSU<br>mean)                                       | -0.926<br>(1.643)       | 0.133<br>(0.473)           | -0.916<br>(2.311)       | -0.391<br>(0.888)          | -2.402<br>(2.371)       | -0.281<br>(0.950)          |
| Age                                                        | 0.00751<br>(0.0105)     | 0.0126**<br>(0.00586)      | 0.00903<br>(0.0102)     | 0.0115**<br>(0.00585)      | 0.00440<br>(0.0104)     | 0.0123**<br>(0.00591)      |
| Age squared                                                | -0.000185<br>(0.000117) | -0.000202***<br>(6.94e-05) | -0.000202*<br>(0.0001)  | -0.000191***<br>(6.92e-05) | -0.0002<br>(0.0001)     | -0.000199***<br>(6.98e-05) |
| Age (PSU mean)                                             | -0.00579<br>(0.0457)    | -0.0256*<br>(0.0154)       | 0.0507<br>(0.0937)      | -0.00283<br>(0.0328)       | 0.125<br>(0.0989)       | -0.00768<br>(0.0365)       |
| Higher Education                                           | -0.0196<br>(0.0688)     | 0.216***<br>(0.0283)       | -0.0297<br>(0.0692)     | 0.219***<br>(0.0282)       | -0.0160<br>(0.0679)     | 0.217***<br>(0.0282)       |

|                                |                     |                  |                     |                   |                     |                    |
|--------------------------------|---------------------|------------------|---------------------|-------------------|---------------------|--------------------|
| Higher education<br>(PSU mean) | 1.999<br>(1.261)    | 0.480<br>(0.401) | -0.680<br>(2.631)   | 0.224<br>(0.935)  | -2.198<br>(2.687)   | 0.00290<br>(0.973) |
| Constant                       | 0.540<br>(1.975)    | 0.340<br>(0.752) | -3.699<br>(5.717)   | -0.888<br>(1.952) | -8.185<br>(5.964)   | -0.742<br>(2.132)  |
| Level 1                        |                     |                  |                     |                   |                     |                    |
| St dev<br>(Corruption)         | 1.44***<br>(0.081)  |                  | 1.48***<br>(0.071)  |                   | 1.44***<br>(0.074)  |                    |
| St dev (Contact)               | .752***<br>.022     |                  | .752***<br>.022     |                   | .752***<br>.022     |                    |
| Cross-eq correlat.             | 0.0940*<br>(0.0531) |                  | 0.0833*<br>(0.0494) |                   | 0.108**<br>(0.05)   |                    |
| Level 2                        |                     |                  |                     |                   |                     |                    |
| Cross-eq<br>correlation        | -0.0554<br>(0.0553) |                  | -0.0582<br>(0.0539) |                   | -0.0421<br>(0.0549) |                    |
| Observations                   | 20479               |                  | 20479               |                   | 20479               |                    |
| Log Likelihood                 | -11528              |                  | -11528              |                   | -11521              |                    |
| Df                             | 40                  |                  | 40                  |                   | 54                  |                    |

## Appendix H

**Table H1: Summary of the core set of the marginal effect results based on Appendix G**

| <b>Core Independent variables</b>                                              | <b>Model 6<br/>dy/dx</b> | <b>Model 7<br/>dy/dx</b> | <b>Model 8<br/>dy/dx</b> |
|--------------------------------------------------------------------------------|--------------------------|--------------------------|--------------------------|
| LN city size                                                                   | .008**<br>(.003)         | .007***<br>(.004)        | .010***<br>(.003)        |
| LN city size conditional on<br>Institutional trust (PSU)                       | .009**<br>(0.004)        | -                        | -                        |
| LN city size conditional on<br>Trust in friends (PSU)                          | -                        | .007*<br>(.004)          | -                        |
| LN city size conditional on<br>Institutional Trust &<br>Trust in friends (PSU) | -                        | -                        | 0.012***<br>(0.003)      |

Note: Ln city size, bonding and bridging trust variables are centered. The 'dy/dx' indicates the marginal effect of the respective variable (i.e. margins of derivative). In case of interaction terms, this shows the marginal effect of city size conditional on a mean value of the respective trust variable.

**Appendix I: Robustness checks. Plotting marginal effects of city size on corruption conditional on bonding and bridging trust (based on Appendix G) with 90% confidence intervals**

**Figure I1a: The marginal effect of city size conditional on institutional trust (bridging) on corruption**

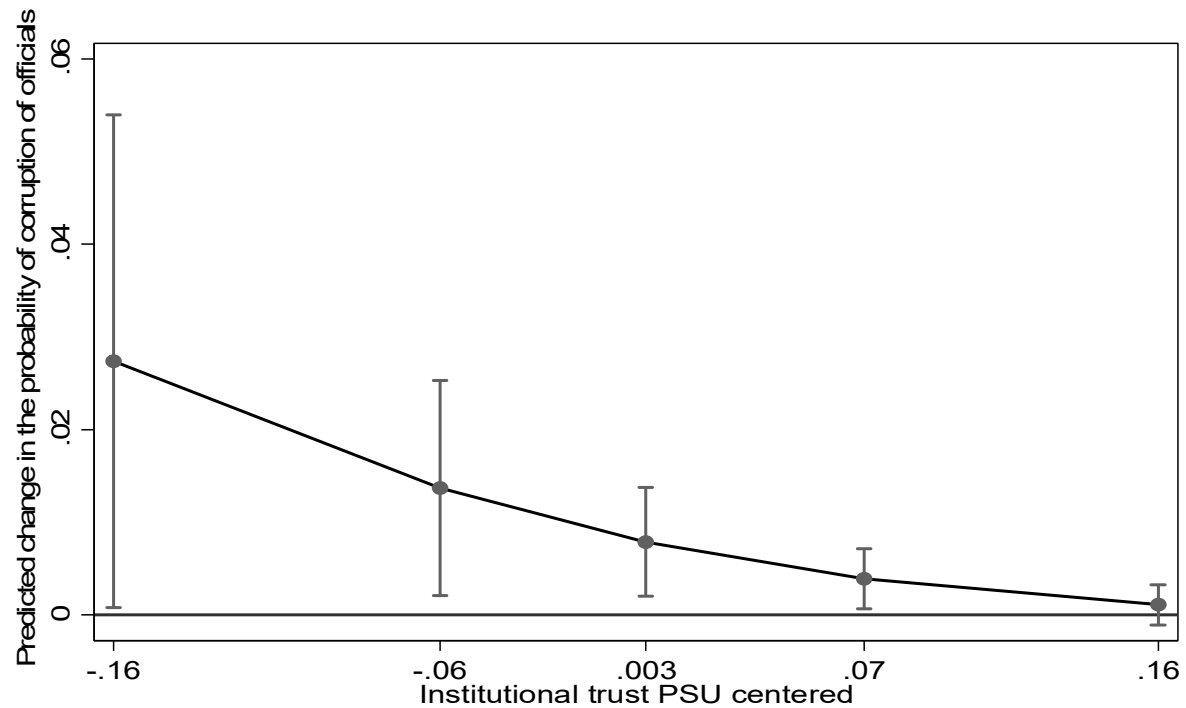

**Figure I1b: The marginal effect of city size conditional on trust in friends (bonding) on corruption with 90 % confidence interval**

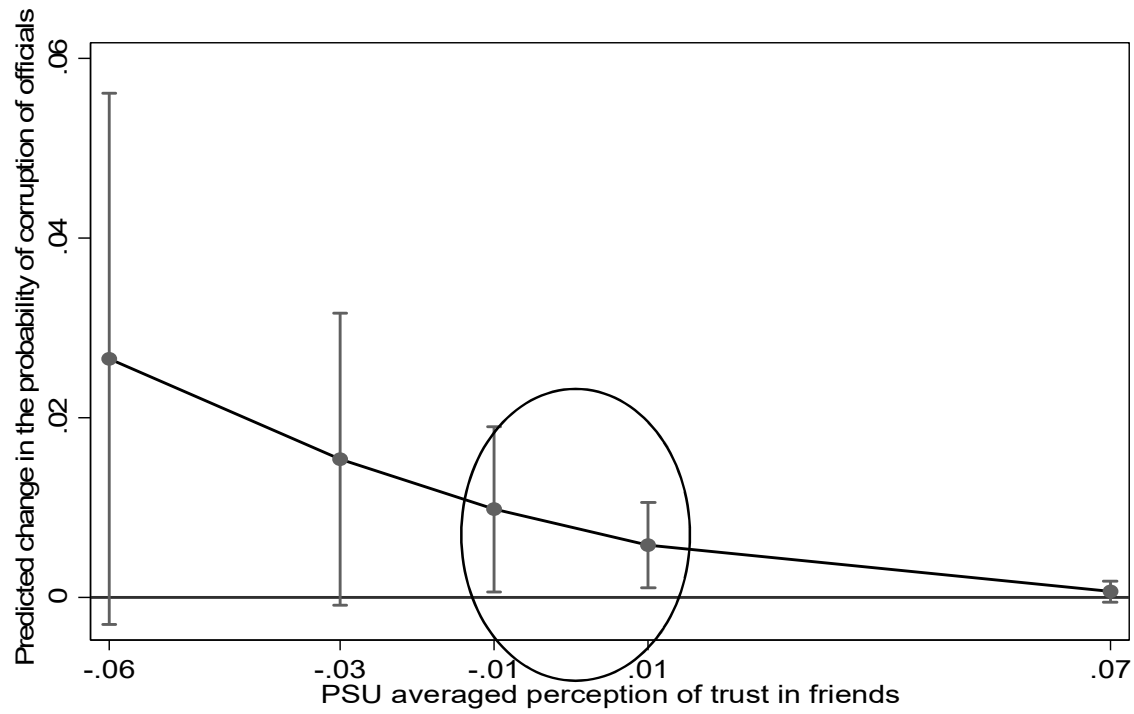



**Figure 11c: The marginal effect of city size conditional on bridging-bonding trust jointly on corruption with 90% confidence interval**

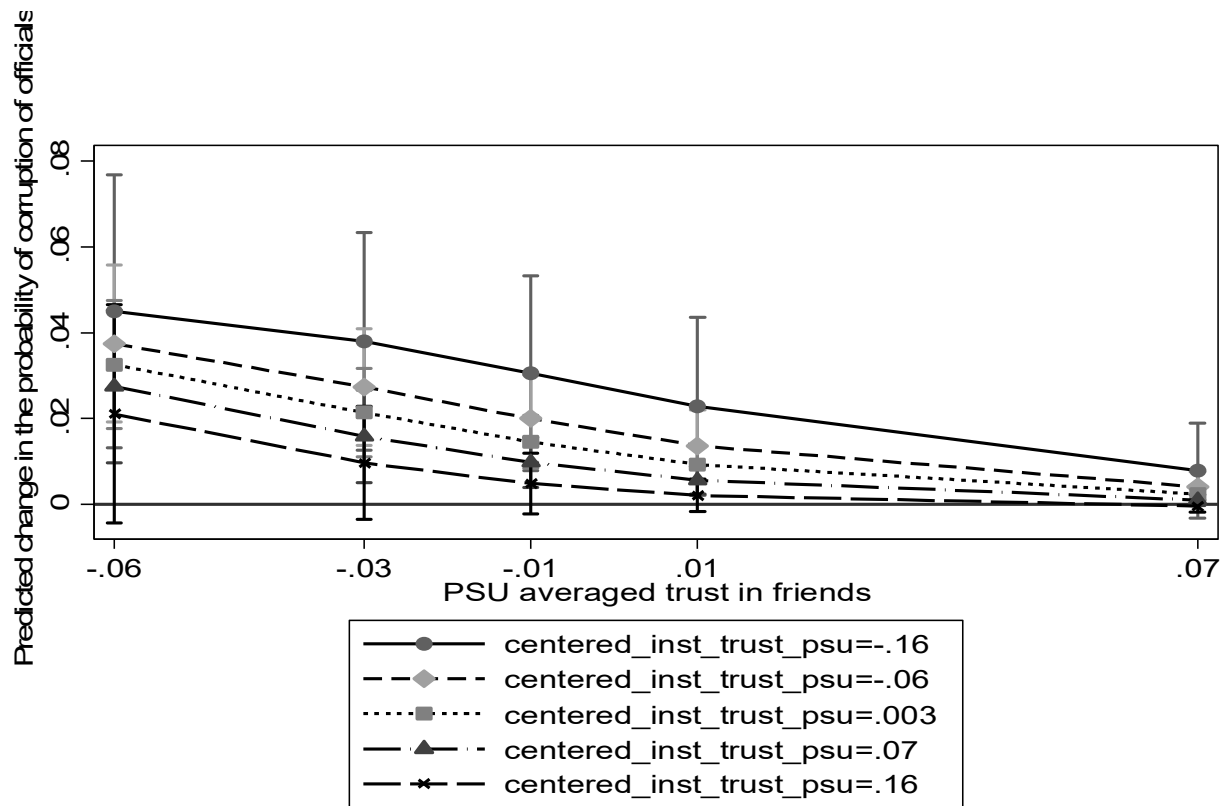

Supplement: Supplementary file 1 [file 17590694]
